# Supplementary material for: Indole primes plant defense against necrotrophic fungal pathogen infection
Source: PubMed Central journal article supplement (PMC6239302; doi:10.1371/journal.pone.0207607), 2018-11-16
Supplement: pone.0207607.s002.pdf [file pone.0207607.s002.pdf]

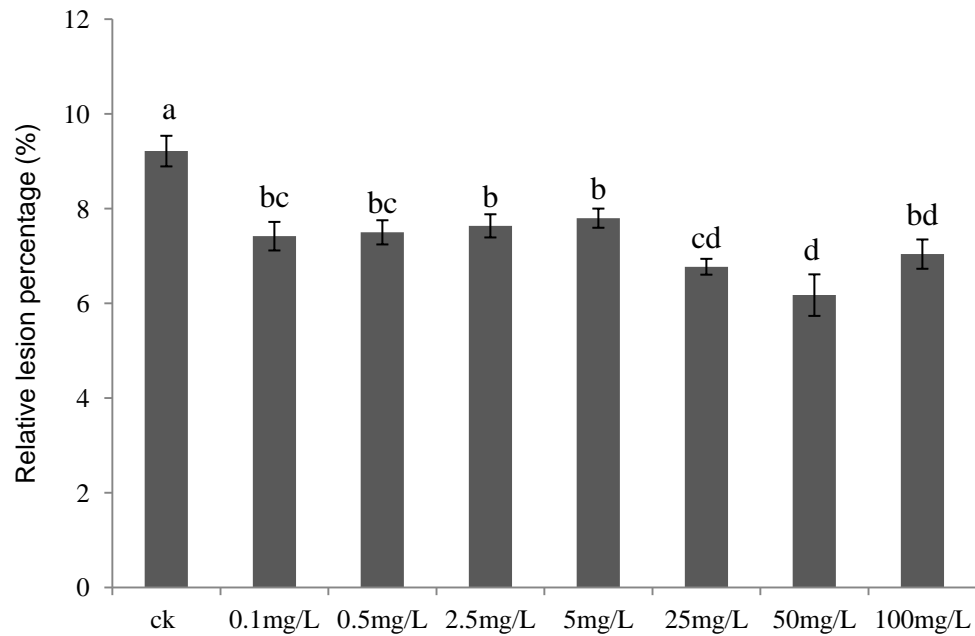

**S2 Fig. Dose dependent priming effect of indole.**

Detached maize leaves were pretreated with indole at different concentrations for 2 d and subsequently inoculated with *F. graminearum* spores for 3 d and relative lesion percentage was calculated. Different lowercase letters indicate significant difference (Tukey's HSD test,  $P < 0.05$ ,  $n = 4$ ).
