# Supplementary material for: Indole primes plant defense against necrotrophic fungal pathogen infection
Source: PubMed Central journal article supplement (PMC6239302; doi:10.1371/journal.pone.0207607), 2018-11-16
Supplement: pone.0207607.s003.pdf [file pone.0207607.s003.pdf]

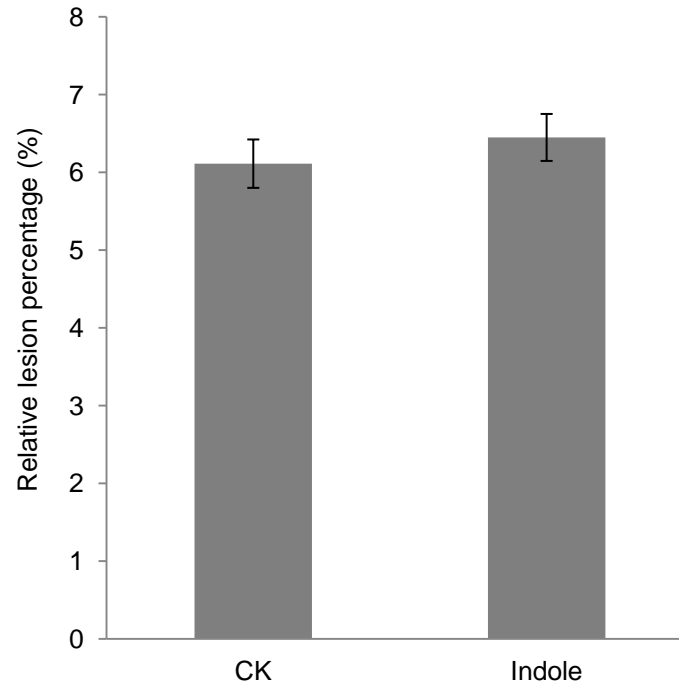

**S3 Fig. Indole did not prime defense with 24 h pretreatment on detached maize leaves.**

Indole (50 mg L<sup>-1</sup>) was used to pretreat detached maize leaves for 24 h and *Fusarium graminearum* spores were inoculated. None-treated leaves were used as the control (CK). Relative lesion percentage was calculated and no significant difference was detected with student's *t*-test. Error bars indicate SE (*n*=3).
