# Supplementary material for: Indole primes plant defense against necrotrophic fungal pathogen infection
Source: PubMed Central journal article supplement (PMC6239302; doi:10.1371/journal.pone.0207607), 2018-11-16
Supplement: pone.0207607.s004.pdf [file pone.0207607.s004.pdf]

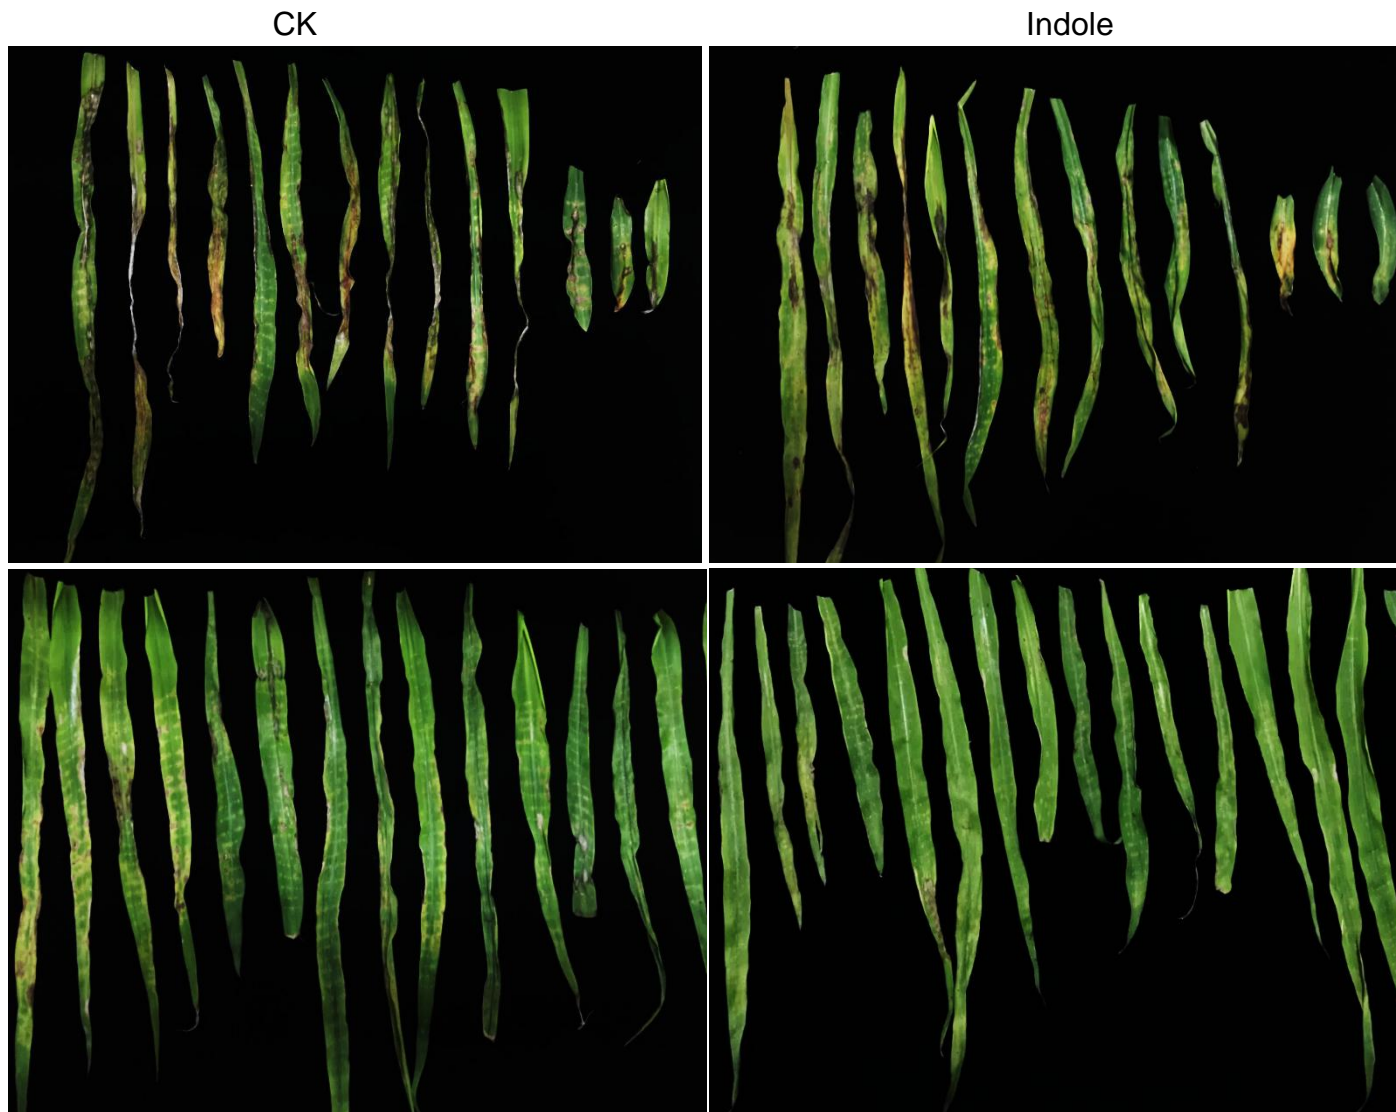

**S4 Fig. Indole primed disease resistance in intact maize seedlings.**

Two-week-old maize seedlings were pretreated with indole and inoculated with *F. graminearum* spores for 3 d and leaves were cut for photographing.
