# Supplementary material for: Indole primes plant defense against necrotrophic fungal pathogen infection
Source: PubMed Central journal article supplement (PMC6239302; doi:10.1371/journal.pone.0207607), 2018-11-16
Supplement: pone.0207607.s005.pdf [file pone.0207607.s005.pdf]

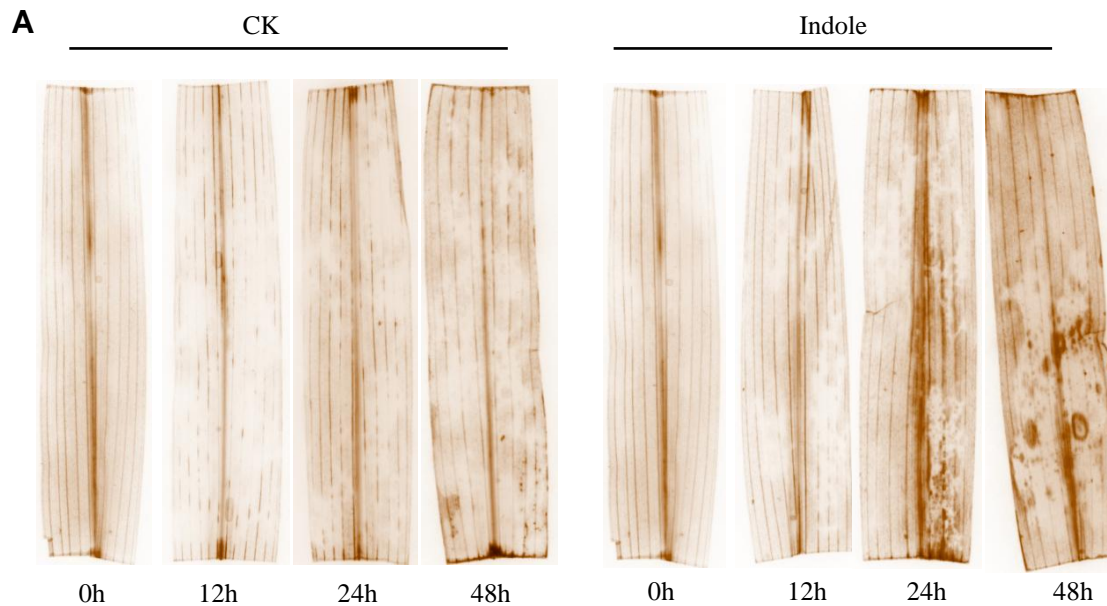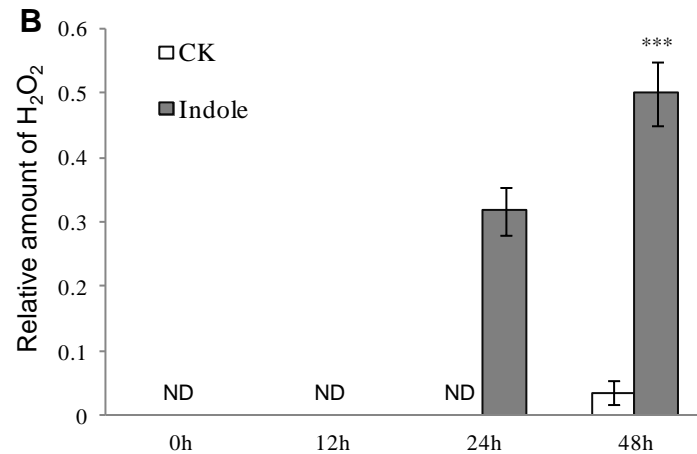

**S5 Fig. Indole pretreatment resulted in H<sub>2</sub>O<sub>2</sub> accumulation in maize leaves.**

**A**, H<sub>2</sub>O<sub>2</sub> accumulation by DAB staining in maize detached leaves with (Indole) or without (CK) indole pretreatment for 0, 12, 24 and 48 h. **B**, quantification of H<sub>2</sub>O<sub>2</sub>. Asterisks indicate significant difference (Student's *t*-test, \*\*\**P*<0.001). ND, none detected. Error bars indicate SE (*n*=3).
