# Supplementary material for: Indole primes plant defense against necrotrophic fungal pathogen infection
Source: PubMed Central journal article supplement (PMC6239302; doi:10.1371/journal.pone.0207607), 2018-11-16
Supplement: pone.0207607.s006.pdf [file pone.0207607.s006.pdf]

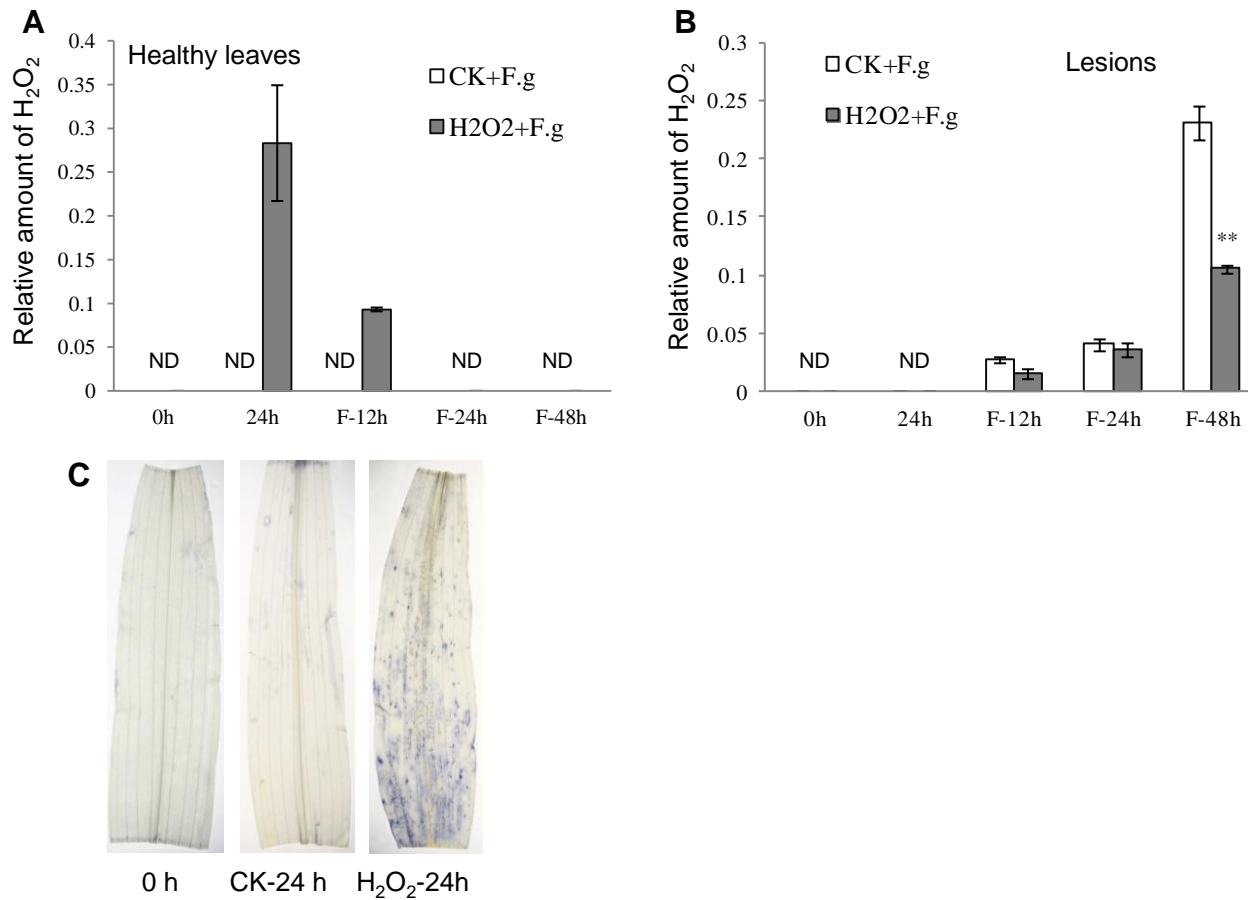

**S6 Fig. ROS accumulation in maize leaves pretreated with H<sub>2</sub>O<sub>2</sub>.**

H<sub>2</sub>O<sub>2</sub> accumulation by DAB staining in maize detached leaves with or without (CK) H<sub>2</sub>O<sub>2</sub> pretreatment for 0, 24 h and subsequently inoculated with pathogen spores (F.g) for 12, 24 and 48 h (F-12h, 24h, 48h) as shown in Fig.6. Relative amount of H<sub>2</sub>O<sub>2</sub> at healthy leaf regions (A) and lesions (B) was calculated based on pixels taken with Photoshop. Asterisks indicate significant difference (Student's *t*-test, \*\**P*<0.01). ND, none detected. Error bars indicate SE (*n*=3). C, Superoxide radical (O<sub>2</sub><sup>-</sup>) was stained with NBT after H<sub>2</sub>O<sub>2</sub> pretreatment for 24 h.
