# Supplementary material for: Indole primes plant defense against necrotrophic fungal pathogen infection
Source: PubMed Central journal article supplement (PMC6239302; doi:10.1371/journal.pone.0207607), 2018-11-16
Supplement: pone.0207607.s008.pdf [file pone.0207607.s008.pdf]

**S1 Table Primers used in this study.**

| <b>Gene</b>       | <b>Forward Primers(5'-&gt;3')</b> | <b>Reverse Primers (5'-&gt;3')</b> |
|-------------------|-----------------------------------|------------------------------------|
| <i>ZmPR1</i>      | GAACTCGCCGCAGGACTAC               | GAGCCCCAGAAGAGGTTCTC               |
| <i>ZmPR5</i>      | GTCATCGATGGCTACAACCT              | GGCAGAAGGTGACTTGGTA                |
| <i>ZmPRm3</i>     | GGCTCTACGCCTACGTCAAC              | GATGGAGAGGAGCACCTTGA               |
| <i>ZmPRm6</i>     | GCGCAGACCTACAACCAGA               | GGAGAAATTGATGGGGTACG               |
| <i>ZmAn2</i>      | GATGATGAGCCATGTCGATG              | GAAAGGTCTGCCTTGTCTCG               |
| <i>ZmTPS6</i>     | CGGTGATCAATGAGCCACTA              | TGACAACATGTGCCAACTCC               |
| <i>ZmLOX1</i>     | AGCATCTCCATCTGATCCATCC            | CGTGCCTCTTGTTCATTGA                |
| <i>ZmPAL3</i>     | TCCTGTCCGCCGTCTTCTGC              | CGGGTTGTCGTTACGGAGTT               |
| <i>ZmSOD2</i>     | CGGGAGAAGATGGTGTGTGT              | ATTTCCGGTGCTCTTGCTAA               |
| <i>ZmPOD1</i>     | GCACAAGGTCCTGTTCGTCT              | TTCCCTGATCTCTCCCTCA                |
| <i>ZmCAT1</i>     | GTGAATGCACCAAATGTGC               | TGATGCACTTCTCACGACAG               |
| <i>ZmAPX2</i>     | CCCATCCTATCCTACGCTGA              | AGAAAACCTGCCTGAGGTGA               |
| <i>ZmEfla</i>     | TGGTGTCAATCAAGCCTGGTA             | AACATTGTCACCCGGAAGAG               |
| <i>MoPot2</i>     | ACGACCCGTCTTTACTTATTTGG           | AAGTAGCGTTGGTTTTGTTGGAT            |
| <i>OsUbq</i>      | TTCTGGTCCTTCCACTTTTACG            | ACGATTGATTTAACCAGTCCATGA           |
| <i>ZmEfla-DNA</i> | TCTCTGGGTTTGGAGGGTGAC             | GGCCCTTGTACCAGTCAAGGT              |
| <i>FgEfla</i>     | CCATTCCCTGGGCGCT                  | CCTATTGACAGGTGGTTAGTGACTGG         |
